# Supplementary material for: Spectroscopic characterization of two boron heterocyclic radicals in the solid neon matrix
Source: Royal Society of Chemistry journal article supplement (doi:10.1039/d2cp00076h), 2022-01-01
Supplement: d2cp00076h1.pdf [file d2cp00076h1.pdf]

## Supporting Information

### Spectroscopic characterization of two boron heterocyclic radicals in the solid neon matrix

Jiaping Xu, Xin Xu, Danyang Li, Jiwen Jian\*

*Hangzhou Institute of Advanced Studies, Zhejiang Normal University, 1108 Gengwen Road, Hangzhou, Zhejiang, 311231, China.*

#### Table of Contents:

---

|                                                                                        |       |
|----------------------------------------------------------------------------------------|-------|
| Calculated vibrational frequencies of Species <b>A</b> and <b>B</b> (Table S1-S2)..... | 2-3   |
| The computed electronic transition energies of species <b>A</b> (Table S3) .....       | 4     |
| Calculated vibrational frequencies of Species <b>A-isomer</b> (Table S4) .....         | 5     |
| Calculated vibrational frequencies of Species <b>B-isomer</b> (Table S5-S6) .....      | 6-7   |
| Cyclopentene infrared spectra (Figure S1) .....                                        | 8     |
| Calculated UV-vis spectra of species <b>A</b> (Figure S2) .....                        | 9     |
| Optimized structures of intermediates and transition states (Figure S3-S4) .....       | 10-11 |
| PES for the isomerization reactions from <b>A</b> to <b>B</b> (Figure S5) .....        | 12    |
| Optimized structures of transition states (Figure S6) .....                            | 13    |
| Optimized structures of species <b>B isomers</b> (Figure S7) .....                     | 14    |
| Calculated atomic coordinates of Species <b>A</b> and <b>B</b> .....                   | 15    |

**Table S1.** Calculated vibrational frequencies (unscaled,  $\text{cm}^{-1}$ ) and intensities (in parentheses in  $\text{km/mol}$ ) of species **A** at the B3LYP/aug-ccpVTZ level. The experimentally observed values for  $^{10}\text{B}(\text{C}_5\text{H}_8)$  are also listed for comparison.

| $^{10}\text{B}$        | $^{11}\text{B}$        |                               |                  |
|------------------------|------------------------|-------------------------------|------------------|
| $\text{C}_5\text{H}_8$ | $\text{C}_5\text{H}_8$ | $^{10}\text{B}/^{11}\text{B}$ | Exptl.           |
| 3242.1 (0)             | 3242.1 (0)             | 1.0000                        |                  |
| 3241.0 (1)             | 3241.0 (1)             | 1.0000                        |                  |
| 3061.0 (36)            | 3061.0 (36)            | 1.0000                        |                  |
| 3036.3 (51)            | 3036.3 (51)            | 1.0000                        |                  |
| 3028.6 (33)            | 3028.6 (33)            | 1.0000                        |                  |
| 3016.8 (3)             | 3016.8 (3)             | 1.0000                        |                  |
| 2972.7 (19)            | 2972.7 (19)            | 1.0000                        |                  |
| 2971.1 (44)            | 2971.1 (44)            | 1.0000                        |                  |
| <b>1508.6 (25)</b>     | <b>1481.5 (7)</b>      | <b>1.0183</b>                 | <b>1469.1</b>    |
| 1486.3 (2)             | 1486.3 (2)             | 1.0000                        |                  |
| 1478.9 (5)             | 1478.9 (5)             | 1.0000                        |                  |
| <b>1462.4 (10)</b>     | <b>1448.5 (27)</b>     | <b>1.0096</b>                 | <b>1423.2</b>    |
| 1376.5 (1)             | 1376.2 (1)             | 1.0002                        |                  |
| 1361.4 (1)             | 1361.0 (1)             | 1.0003                        |                  |
| <b>1332.8 (15)</b>     | <b>1332.0 (14)</b>     | <b>1.0006</b>                 | <b>1326.1</b>    |
| <b>1263.9 (9)</b>      | <b>1263.8 (8)</b>      | <b>1.0001</b>                 | <b>1236.9</b>    |
| 1245.7 (0)             | 1240.7 (0)             | 1.0040                        |                  |
| <b>1223.2 (28)</b>     | <b>1220.8 (27)</b>     | <b>1.0020</b>                 | <b>1198.8</b>    |
| 1141.4 (5)             | 1141.2 (5)             | 1.0002                        |                  |
| <b>1084.7 (11)</b>     | <b>1084.4 (12)</b>     | <b>1.0003</b>                 | <b>1066.7</b>    |
| 1047.0 (0)             | 1046.8 (0)             | 1.0002                        |                  |
| 1024.6 (0)             | 1024.5 (0)             | 1.0001                        |                  |
| 994.1 (0)              | 994.0 (0)              | 1.0001                        |                  |
| <b>920.7 (18)</b>      | <b>919.7 (20)</b>      | <b>1.0011</b>                 | <b>868.3</b>     |
| <b>887.8 (16)</b>      | <b>882.1 (13)</b>      | <b>1.0065</b>                 | <b>864.9</b>     |
| 870.3 (7)              | 870.1 (7)              | 1.0002                        |                  |
| 849.6 (2)              | 849.6 (2)              | 1.0000                        |                  |
| 791.1 (0)              | 789.8 (0)              | 1.0017                        |                  |
| <b>657.5 (12)</b>      | <b>647.1 (14)</b>      | <b>1.0161</b>                 | <b>637.6</b>     |
| <b>566.0 (70)</b>      | <b>561.3 (70)</b>      | <b>1.0084</b>                 | <b>549.2 (s)</b> |
| 512.0 (1)              | 512.0 (1)              | 1.0000                        |                  |
| 467.3 (5)              | 462.5 (5)              | 1.0104                        |                  |
| 365.4 (0)              | 364.2 (0)              | 1.0033                        |                  |
| 346.1 (8)              | 337.9 (7)              | 1.0243                        |                  |
| 271.8 (0)              | 271.2 (0)              | 1.0022                        |                  |
| 117.7 (0)              | 117.7 (0)              | 1.0000                        |                  |

**Table S2.** Calculated vibrational frequencies (unscaled,  $\text{cm}^{-1}$ ) and intensities (in parentheses in  $\text{km/mol}$ ) of species **B** at the B3LYP/aug-ccpVTZ level. The experimentally observed values for  $^{10}\text{B}(\text{C}_5\text{H}_8)$  are also listed for comparison.

| $^{10}\text{B}$        | $^{11}\text{B}$        |                               |                  |
|------------------------|------------------------|-------------------------------|------------------|
| $\text{C}_5\text{H}_8$ | $\text{C}_5\text{H}_8$ | $^{10}\text{B}/^{11}\text{B}$ | Exptl.           |
| 3181.0 (19)            | 3181.0 (19)            | 1.0000                        |                  |
| 3169.5 (27)            | 3169.5 (27)            | 1.0000                        |                  |
| 3149.6 (9)             | 3149.6 (9)             | 1.0000                        |                  |
| 3082.7 (25)            | 3082.7 (25)            | 1.0000                        |                  |
| 3042.2 (18)            | 3042.2 (18)            | 1.0000                        |                  |
| 3015.0 (9)             | 3015.0 (9)             | 1.0000                        |                  |
| 2999.8 (15)            | 2999.8 (15)            | 1.0000                        |                  |
| 2997.2 (3)             | 2997.2 (3)             | 1.0000                        |                  |
| 1471.2 (6)             | 1470.4 (4)             | 1.0005                        |                  |
| <b>1465.1 (24)</b>     | <b>1464.5 (18)</b>     | <b>1.0004</b>                 | <b>1431.2</b>    |
| 1459.4 (12)            | 1457.9 (10)            | 1.0010                        |                  |
| <b>1419.3 (16)</b>     | <b>1417.7 (9)</b>      | <b>1.0011</b>                 | <b>1408.1</b>    |
| <b>1399.4 (20)</b>     | <b>1398.5 (18)</b>     | <b>1.0006</b>                 | <b>1367.6</b>    |
| <b>1369.4 (174)</b>    | <b>1355.9 (152)</b>    | <b>1.0100</b>                 | <b>1342.1(s)</b> |
| 1319.9 (7)             | 1316.7 (12)            | 1.0024                        |                  |
| <b>1257.7 (38)</b>     | <b>1248.2 (44)</b>     | <b>1.0076</b>                 | <b>1240.6</b>    |
| <b>1165.6 (47)</b>     | <b>1142.0 (55)</b>     | <b>1.0207</b>                 | <b>1149.4</b>    |
| 1128.7 (4)             | 1110.7 (7)             | 1.0162                        |                  |
| 1110.1 (6)             | 1107.6 (5)             | 1.0023                        |                  |
| 1098.2 (3)             | 1097.9 (4)             | 1.0003                        |                  |
| 1061.5 (1)             | 1057.9 (2)             | 1.0034                        |                  |
| 990.2 (1)              | 990.1 (1)              | 1.0001                        |                  |
| <b>936.7 (12)</b>      | <b>936.5 (12)</b>      | <b>1.0002</b>                 | <b>929.0</b>     |
| <b>923.4 (15)</b>      | <b>909.5 (16)</b>      | <b>1.0153</b>                 | <b>918.8</b>     |
| 837.2 (0)              | 836.4 (0)              | 1.0010                        |                  |
| 785.6 (0)              | 783.3 (0)              | 1.0029                        |                  |
| 777.8 (6)              | 777.2 (6)              | 1.0008                        |                  |
| 753.5 (1)              | 751.1 (1)              | 1.0032                        |                  |
| <b>732.1 (17)</b>      | <b>732.0 (17)</b>      | <b>1.0001</b>                 | <b>719.8</b>     |
| <b>635.7 (28)</b>      | <b>634.6 (28)</b>      | <b>1.0017</b>                 | --               |
| 527.4 (0)              | 525.5 (0)              | 1.0036                        |                  |
| 461.1 (0)              | 458.7 (0)              | 1.0052                        |                  |
| 302.9 (2)              | 299.4 (2)              | 1.0117                        |                  |
| 272.7 (0)              | 271.1 (0)              | 1.0059                        |                  |
| 135.3 (0)              | 135.1 (0)              | 1.0015                        |                  |
| 29.0 (1)               | 29.0 (1)               | 1.0000                        |                  |

**Table S3.** The computed electronic transition energies ( $\Delta E$ ), and the oscillator strengths ( $f$ ) of species **A** by the B3LYP-TD/ aug-cc-pVTZ level of theory.

| States                          | Transition Energy (nm) | Oscillator strength ( $f$ ) |
|---------------------------------|------------------------|-----------------------------|
| S <sub>1</sub> ( 2-A'' )        | 534.9                  | 0.0000                      |
| <b>S<sub>2</sub> ( 2-A'' )</b>  | <b>427.7</b>           | <b>0.0679</b>               |
| S <sub>3</sub> ( 1-A' )         | 401.1                  | 0.0024                      |
| S <sub>4</sub> ( 2-A'' )        | 317.9                  | 0.0002                      |
| S <sub>5</sub> ( 2-A' )         | 289.4                  | 0.0042                      |
| S <sub>6</sub> ( 2-A' )         | 281.3                  | 0.0052                      |
| S <sub>7</sub> ( 2-A'' )        | 275.1                  | 0.0000                      |
| S <sub>8</sub> ( 2-A'' )        | 270.5                  | 0.0007                      |
| S <sub>9</sub> ( 2-A' )         | 248.7                  | 0.0069                      |
| S <sub>10</sub> ( 2-A'' )       | 242.3                  | 0.0134                      |
| S <sub>11</sub> ( 3-A' )        | 241.7                  | 0.0096                      |
| S <sub>12</sub> ( 2-A' )        | 238.1                  | 0.0001                      |
| S <sub>13</sub> ( 2-A'' )       | 238.1                  | 0.0002                      |
| S <sub>14</sub> ( 2-A' )        | 235.2                  | 0.0090                      |
| S <sub>15</sub> ( 2-A'' )       | 231.5                  | 0.0008                      |
| S <sub>16</sub> ( 3-A'' )       | 219.1                  | 0.0000                      |
| S <sub>17</sub> ( 3-A' )        | 216.6                  | 0.0169                      |
| <b>S<sub>18</sub> ( 2-A'' )</b> | <b>215.0</b>           | <b>0.0606</b>               |
| S <sub>19</sub> ( 3-A' )        | 214.4                  | 0.0038                      |
| S <sub>20</sub> ( 2-A'' )       | 213.2                  | 0.0143                      |
| S <sub>21</sub> ( 2-A'' )       | 211.4                  | 0.0000                      |
| S <sub>22</sub> ( 3-A'' )       | 209.9                  | 0.0043                      |
| S <sub>23</sub> ( 2-A'' )       | 207.1                  | 0.0107                      |
| S <sub>24</sub> ( 2-A' )        | 206.4                  | 0.0072                      |
| S <sub>25</sub> ( 3-A' )        | 205.3                  | 0.0015                      |
|                                 |                        |                             |
|                                 |                        |                             |
|                                 |                        |                             |

**Table S4.** Calculated vibrational frequencies (unscaled,  $\text{cm}^{-1}$ ) and intensities (in parentheses in  $\text{km/mol}$ ) of the species **A** isomers 2,3,4-trihydroborinine and 2,3,6-trihydroborinine at the B3LYP/aug-ccpVTZ level.

| 2,3,4-trihydroborinine | 2,3,6-trihydroborinine |
|------------------------|------------------------|
| 3145.3 (18)            | 3147.8 (34)            |
| 3095.0 (27)            | 3119.9 (13)            |
| 3052.8 (34)            | 3061.7 (17)            |
| 3045.7 (19)            | 3032.8 (31)            |
| 3036.2 (34)            | 3014.3 (8)             |
| 3015.8 (30)            | 2995.1 (35)            |
| 2974.6 (12)            | 2965.9 (9)             |
| 2970.4 (13)            | 2941.2 (6)             |
| <b>1578.7 (31)</b>     | <b>1697.6 (11)</b>     |
| 1494.7 (3)             | 1488.8 (3)             |
| <b>1466.4 (14)</b>     | 1422.7 (5)             |
| 1424.4 (4)             | <b>1406.9 (17)</b>     |
| <b>1411.3 (31)</b>     | 1405.0 (3)             |
| 1374.7 (1)             | <b>1366.4 (16)</b>     |
| 1361.4 (5)             | <b>1301.2 (26)</b>     |
| <b>1320.5 (15)</b>     | 1277.1 (3)             |
| 1256.6 (3)             | <b>1245.1 (12)</b>     |
| <b>1225.6 (11)</b>     | <b>1176.8 (27)</b>     |
| <b>1166.2 (29)</b>     | 1157.0 (4)             |
| 1152.3 (4)             | 1130.2 (5)             |
| 1134.6 (4)             | 1083.8 (6)             |
| 1044.3 (1)             | 1021.9 (4)             |
| 1025.9 (0)             | 1001.6 (0)             |
| 984.6 (8)              | <b>939.8 (11)</b>      |
| 949.5 (6)              | 904.9 (6)              |
| 923.2 (8)              | 872.8 (3)              |
| 842.3 (2)              | 844.6 (1)              |
| 819.2 (3)              | <b>784.6 (12)</b>      |
| 766.1 (1)              | 774.8 (8)              |
| <b>704.9 (20)</b>      | <b>653.0 (23)</b>      |
| 661.3 (8)              | 589.1 (3)              |
| 504.8 (0)              | 490.8 (1)              |
| 428.5 (1)              | 448.0 (0)              |
| 288.6 (3)              | 371.3 (0)              |
| 225.4 (1)              | 178.9 (5)              |
| 174.6 (15)             | 82.3 (4)               |

**Table S5.** Calculated vibrational frequencies (unscaled,  $\text{cm}^{-1}$ ) and intensities (in parentheses in  $\text{km/mol}$ ) of the species **B** isomer 1-methylene-2,3-dihydro-*1H*-borole radical at the B3LYP/aug-ccpVTZ level.

| $^{10}\text{B}$        | $^{11}\text{B}$        |                               |
|------------------------|------------------------|-------------------------------|
| $\text{C}_5\text{H}_8$ | $\text{C}_5\text{H}_8$ | $^{10}\text{B}/^{11}\text{B}$ |
| 3180.8 (14)            | 3180.8 (14)            | 1.0000                        |
| 3160.3 (27)            | 3160.3 (27)            | 1.0000                        |
| 3125.8 (24)            | 3125.8 (24)            | 1.0000                        |
| 3108.0 (16)            | 3108.0 (16)            | 1.0000                        |
| 3042.4 (22)            | 3042.4 (22)            | 1.0000                        |
| 3018.9 (15)            | 3018.9 (15)            | 1.0000                        |
| 3017.1 (6)             | 3017.1 (6)             | 1.0000                        |
| 3002.4 (28)            | 3002.4 (28)            | 1.0000                        |
| <b>1583.2 (107)</b>    | <b>1581.8 (99)</b>     | <b>1.0009</b>                 |
| <b>1476.6 (44)</b>     | <b>1472.2 (37)</b>     | <b>1.0030</b>                 |
| 1465.7 (13)            | 1465.4 (10)            | 1.0002                        |
| 1430.4 (9)             | 1430.3 (10)            | 1.0001                        |
| <b>1406.6 (59)</b>     | <b>1397.6 (55)</b>     | <b>1.0064</b>                 |
| 1323.1 (5)             | 1320.7 (3)             | 1.0018                        |
| <b>1282.5 (32)</b>     | <b>1259.2 (40)</b>     | <b>1.019</b>                  |
| 1219.3 (2)             | 1219.2 (2)             | 1.0001                        |
| <b>1197.5 (38)</b>     | <b>1179.5 (28)</b>     | <b>1.0153</b>                 |
| 1155.9 (7)             | 1138.4 (17)            | 1.0154                        |
| 1129.4 (0)             | 1128.6 (1)             | 1.0007                        |
| 1102.1 (5)             | 1098.3 (7)             | 1.0035                        |
| 1024.8 (0)             | 1024.8 (0)             | 1.0000                        |
| 988.4 (2)              | 987.9 (3)              | 1.0005                        |
| <b>937.8 (25)</b>      | <b>932.7 (23)</b>      | <b>1.0055</b>                 |
| 902.1 (11)             | 902.1 (11)             | 1.0000                        |
| 819.6 (2)              | 819.3 (2)              | 1.0004                        |
| <b>816.6 (16)</b>      | <b>810.9 (18)</b>      | <b>1.0070</b>                 |
| 763.7 (1)              | 762.9 (1)              | 1.0011                        |
| <b>750.0 (31)</b>      | <b>749.7 (30)</b>      | <b>1.0004</b>                 |
| 748.3 (3)              | 745.7 (3)              | 1.0035                        |
| 690.2 (3)              | 686.8 (4)              | 1.0050                        |
| 545.9 (1)              | 543.1 (1)              | 1.0052                        |
| 437.6 (2)              | 432.9 (2)              | 1.0109                        |
| 270.7 (0)              | 269.2 (0)              | 1.0056                        |
| 253.2 (1)              | 251.2 (1)              | 1.0080                        |
| 198.4 (0)              | 198.2 (0)              | 1.0010                        |
| 99.9 (0)               | 99.8 (0)               | 1.0010                        |

**Table S6.** Calculated vibrational frequencies (unscaled,  $\text{cm}^{-1}$ ) and intensities (in parentheses in  $\text{km/mol}$ ) of the species **B** isomer 1-methylene-2,5-dihydro-*1H*-borole radical at the B3LYP/aug-ccpVTZ level.

| $^{10}\text{B}$        | $^{11}\text{B}$        |                               |
|------------------------|------------------------|-------------------------------|
| $\text{C}_5\text{H}_8$ | $\text{C}_5\text{H}_8$ | $^{10}\text{B}/^{11}\text{B}$ |
| 3180.1 (12)            | 3180.1 (12)            | 1.0000                        |
| 3171.3 (40)            | 3171.3 (40)            | 1.0000                        |
| 3146.6 (9)             | 3146.6 (9)             | 1.0000                        |
| 3107.0 (14)            | 3107.0 (14)            | 1.0000                        |
| 2988.1 (0)             | 2988.1 (0)             | 1.0000                        |
| 2987.4 (24)            | 2987.4 (24)            | 1.0000                        |
| 2980.6 (32)            | 2980.6 (32)            | 1.0000                        |
| 2976.4 (28)            | 2976.4 (28)            | 1.0000                        |
| 1658.3 (2)             | 1658.3 (2)             | 1.0000                        |
| <b>1476.9 (35)</b>     | <b>1472.7 (26)</b>     | <b>1.0029</b>                 |
| 1414.2 (9)             | 1413.7 (7)             | 1.0004                        |
| <b>1408.9 (23)</b>     | <b>1408.9 (24)</b>     | <b>1.0000</b>                 |
| 1376.8 (1)             | 1375.4 (0)             | 1.0010                        |
| <b>1342.9 (69)</b>     | <b>1317.1 (66)</b>     | <b>1.0196</b>                 |
| <b>1243.5 (50)</b>     | <b>1238.7 (43)</b>     | <b>1.0039</b>                 |
| 1181.0 (9)             | 1170.4 (15)            | 1.0091                        |
| <b>1137.3 (16)</b>     | <b>1128.5 (12)</b>     | <b>1.0078</b>                 |
| <b>1131.0 (13)</b>     | <b>1110.7 (19)</b>     | <b>1.0183</b>                 |
| 1106.2 (1)             | 1105.8 (0)             | 1.0004                        |
| 1105.8 (0)             | 1101.9 (2)             | 1.0035                        |
| 979.4 (0)              | 979.4 (0)              | 1.0000                        |
| 946.3 (0)              | 946.1 (0)              | 1.0002                        |
| <b>941.1 (15)</b>      | <b>941.1 (15)</b>      | <b>1.0000</b>                 |
| 917.5 (2)              | 905.7 (2)              | 1.0130                        |
| 809.6 (0)              | 809.2 (0)              | 1.0005                        |
| 773.7 (5)              | 769.6 (6)              | 1.0053                        |
| <b>760.9 (47)</b>      | <b>760.9 (47)</b>      | <b>1.0000</b>                 |
| 725.9 (3)              | 725.9 (3)              | 1.0000                        |
| <b>683.9 (26)</b>      | <b>680.9 (27)</b>      | <b>1.0044</b>                 |
| 626.8 (0)              | 626.8 (0)              | 1.0000                        |
| 538.1 (0)              | 535.3 (0)              | 1.0052                        |
| 348.6 (0)              | 348.6 (0)              | 1.0000                        |
| 335.4 (4)              | 329.4 (3)              | 1.0182                        |
| 271.3 (0)              | 269.9 (0)              | 1.0052                        |
| 117.9 (0)              | 117.7 (0)              | 1.0017                        |
| 116.7 (0)              | 116.7 (0)              | 1.0000                        |

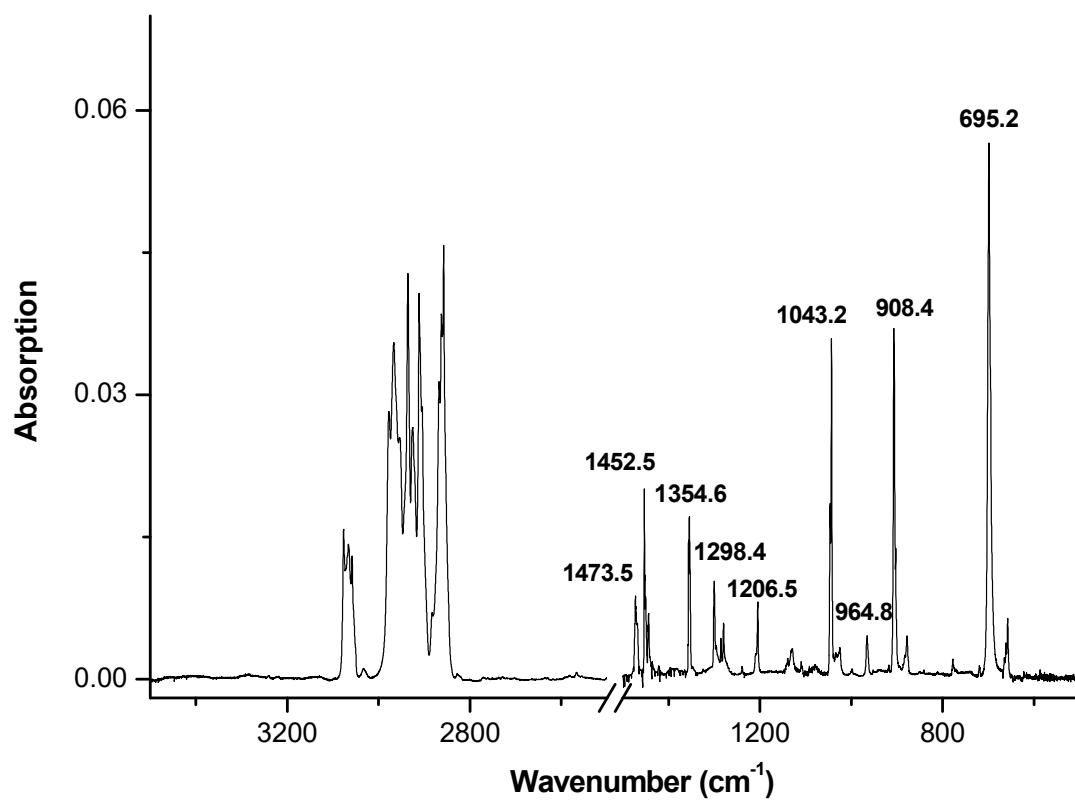

**Figure S1.** Infrared spectra in the 3500-2500 and 1500-500 cm<sup>-1</sup> region from 15 minutes deposition of net 0.05 % cyclopentene in solid argon.



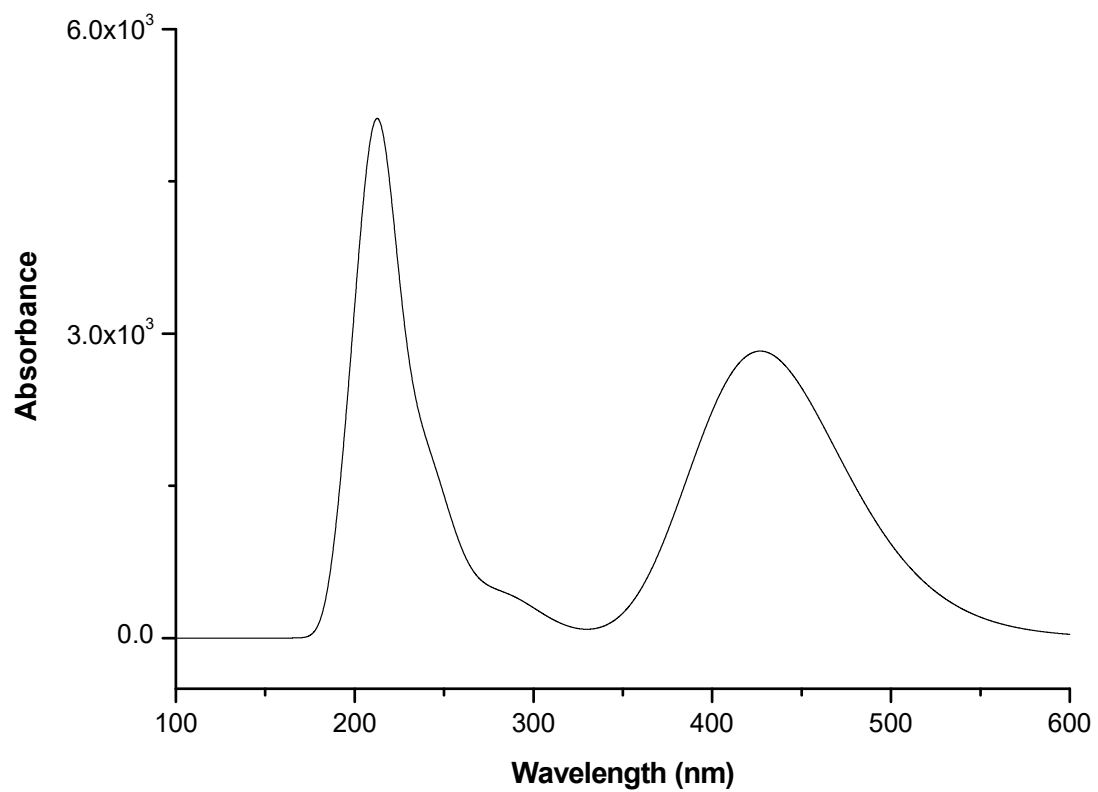

**Figure S2.** The calculated electronic absorptions spectrum of species **A** at the B3LYP-TD/aug-cc-pVTZ level of theory.

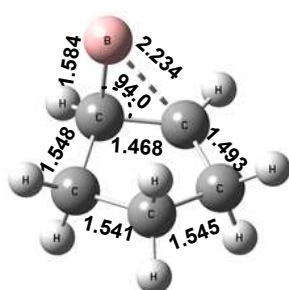

II,  $C_1, ^2A$

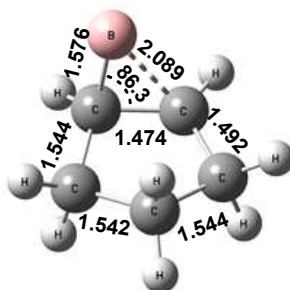

TS1,  $C_1, ^2A$

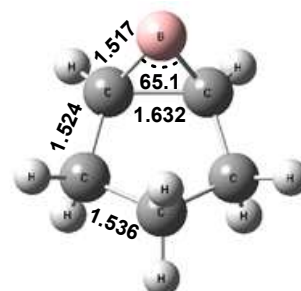

I2,  $C_s, ^2A'$

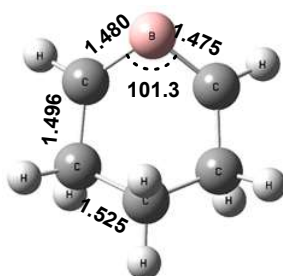

TS2,  $C_1, ^2A$

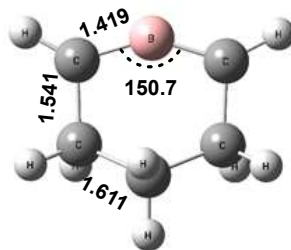

A,  $C_s, ^2A'$

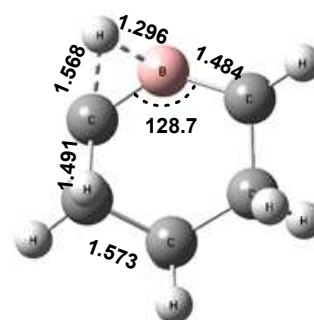

TS3,  $C_1, ^2A$

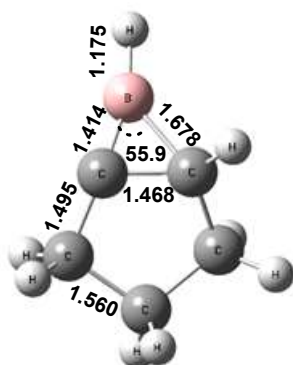

I3,  $C_1, ^2A$

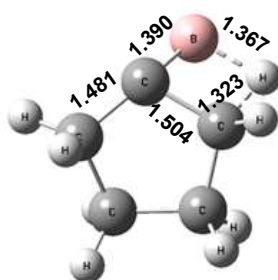

TS4,  $C_1, ^2A$

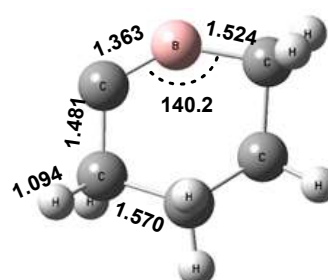

I4,  $C_1, ^2A$

**Figure S3.** Optimized structures of the intermediates and transition states involved in the reaction pathways as shown in figure 7 at the B3LYP/aug-ccpVTZ level. Bond lengths in angstroms and bond angles in degrees.

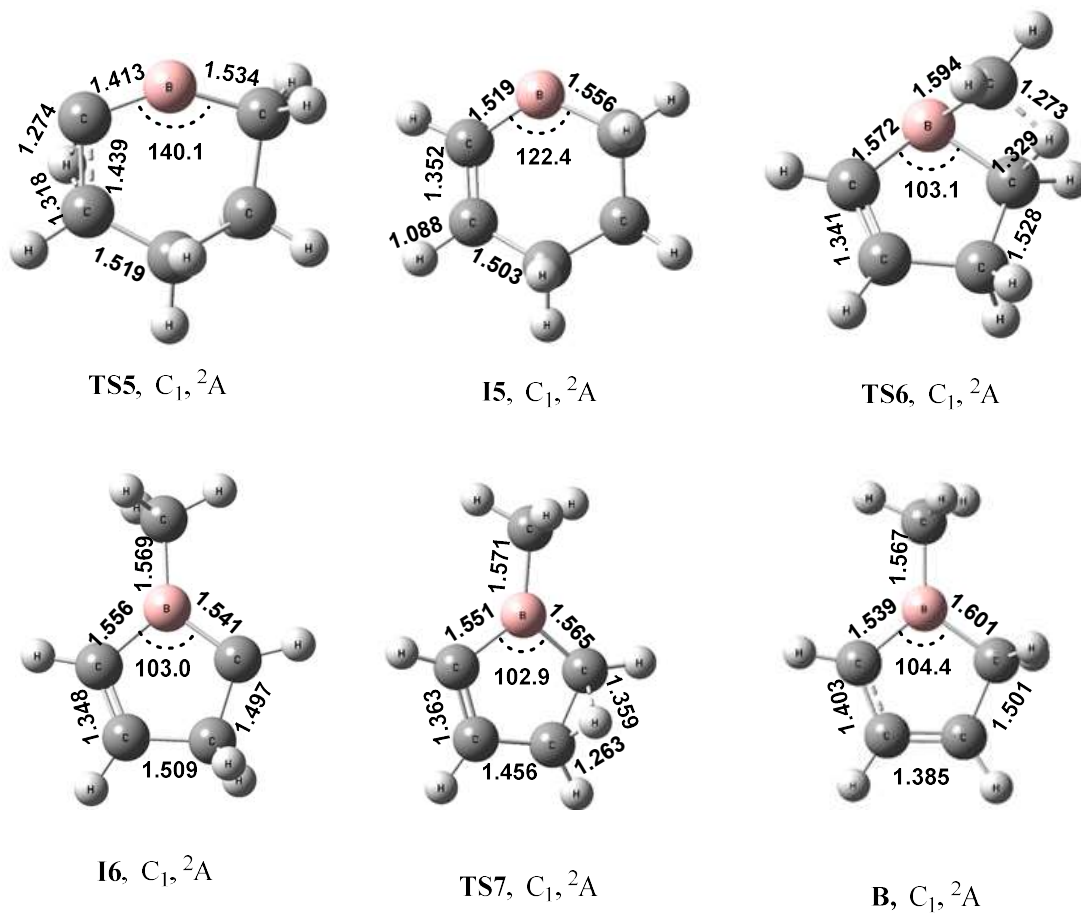

**Figure S4.** Optimized structures of the intermediates and transition states involved in the reaction pathways as shown in figure 7 at the B3LYP/aug-ccpVTZ level. Bond lengths in angstroms and bond angles in degrees.

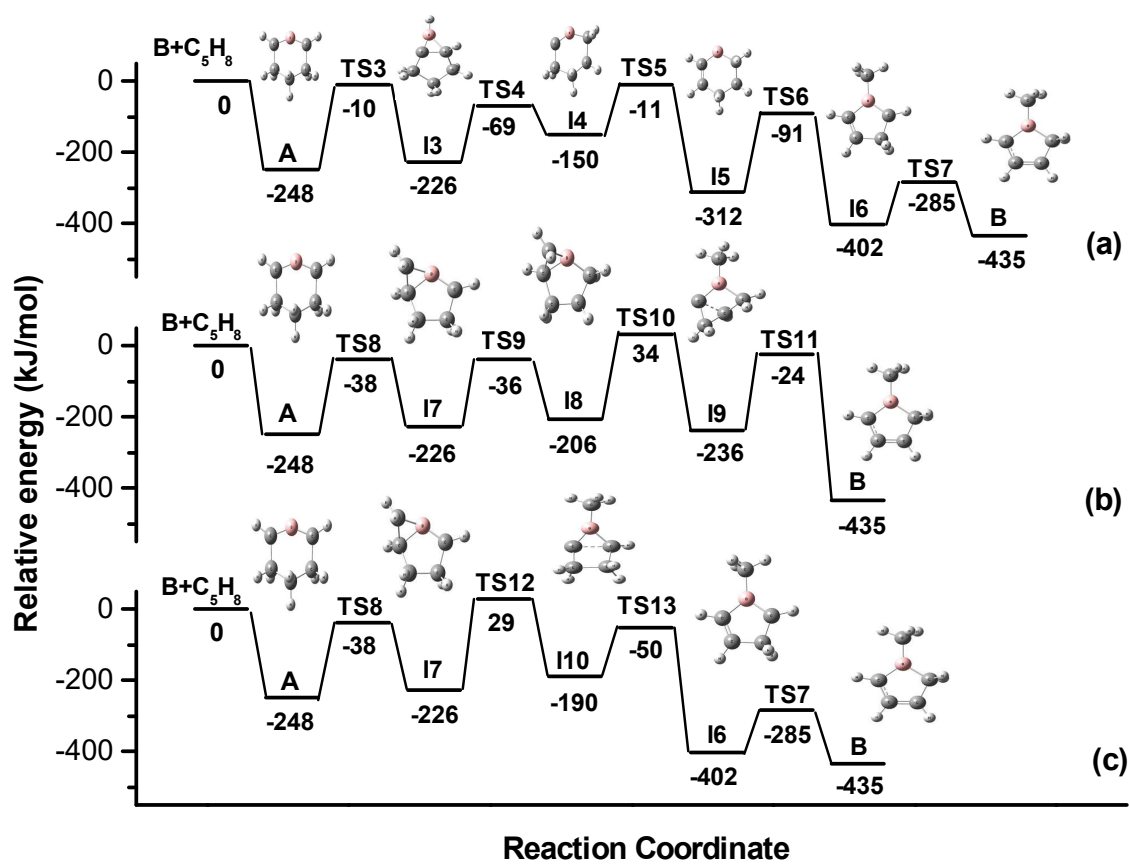

**Figure S5.** Three potential reaction pathways for the isomerization reactions from **A** to **B** were calculated at the CCSD(T)/cc-pVTZ //B3LYP/aug-cc-pVTZ level of theory. The energies are given in kJ/mol after zero-point energy corrections.

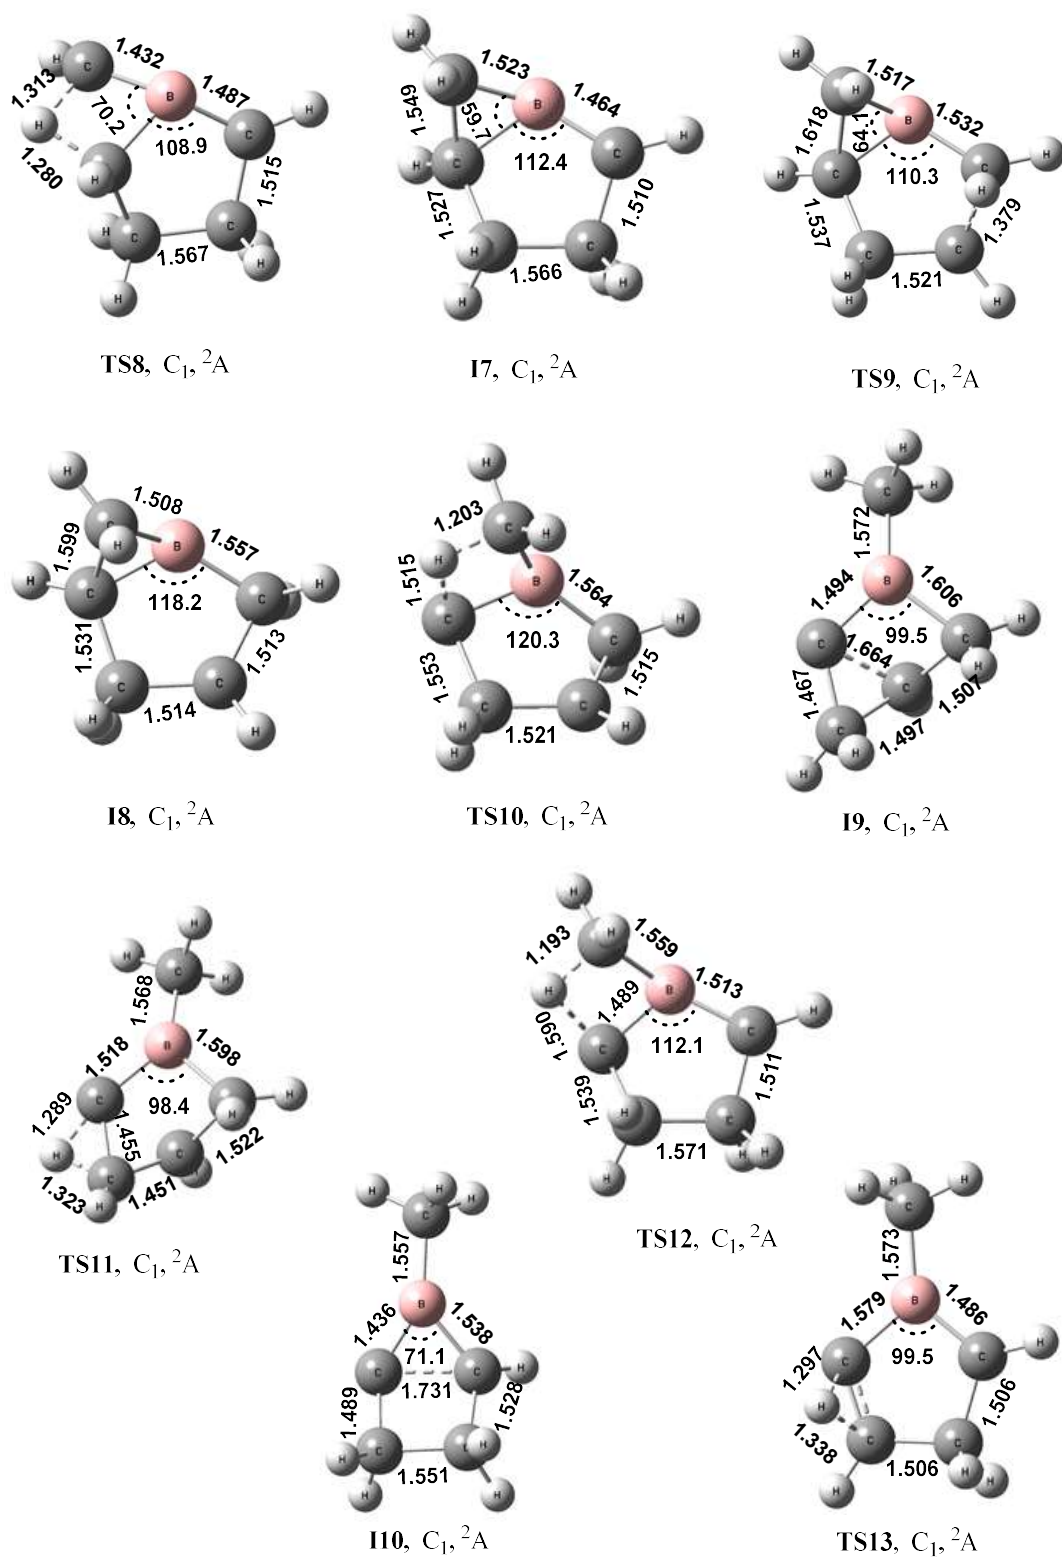

**Figure S6.** Optimized structures of the corresponding intermediates and transition states involved in the reaction pathways from A to B in Figure S4 at the B3LYP/aug-ccpVTZ level. (bond lengths in angstroms and bond angles in degrees).

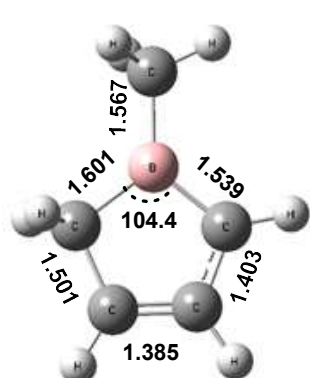

**B**,  $C_1$ ,  $^2A$   
 $E = 0$  kJ/mol

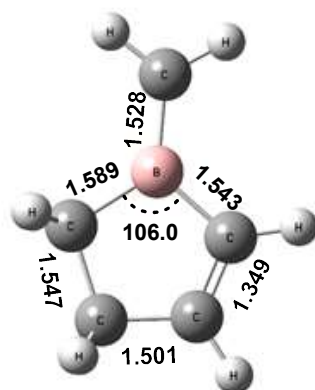

**B-isomer1**,  $C_s$ ,  $^2A''$   
 $E = 49$  kJ/mol

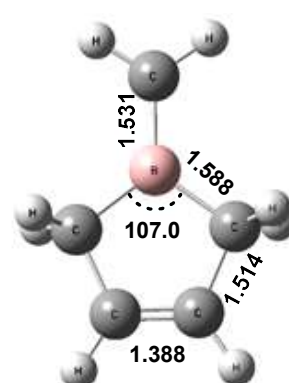

**B-isomer2**,  $C_{2v}$ ,  $^2B_1$   
 $E = 71$  kJ/mol

**Figure S7.** Optimized structures of species **B** and two isomers (1-methylene-2,3-dihydro-*1H*-borole radical and 1-methylene-2,5-dihydro-*1H*-borole radical) at the B3LYP/aug-ccpVTZ level (bond lengths in angstrom and bond angles in degrees). The energy values shown are relative energy calculated at the CCSD(T)/cc-pVTZ //B3LYP/aug-cc-pVTZ level.

**Table S7.** Calculated atomic coordinates (in Angstroms) of species **A** and **B** at the B3LYP/aug-cc-pVTZ level.

(a) **A**, ( $C_s$ ,  $^2A''$ )

|   |             |             |             |
|---|-------------|-------------|-------------|
| C | -0.10756600 | -0.58836500 | 1.31053500  |
| C | -0.10756600 | 0.95014800  | 1.36041600  |
| C | -0.10756600 | 0.95014800  | -1.36041600 |
| C | -0.10756600 | -0.58836500 | -1.31053500 |
| C | 0.47385300  | -1.16208300 | 0.00000000  |
| H | -0.18010800 | 1.45114700  | 2.30990600  |
| H | 1.54955100  | -0.97103900 | 0.00000000  |
| H | -1.13303400 | -0.95119500 | 1.45375700  |
| H | -0.18010800 | 1.45114700  | -2.30990600 |
| H | 0.47548800  | -0.97817900 | -2.14908100 |
| H | -1.13303400 | -0.95119500 | -1.45375700 |
| H | 0.34262200  | -2.24653200 | 0.00000000  |
| H | 0.47548800  | -0.97817900 | 2.14908100  |
| B | -0.09567800 | 1.36102400  | 0.00000000  |

(b) **B**, ( $C_1$ ,  $^2A$ )

|   |             |             |             |
|---|-------------|-------------|-------------|
| C | -0.21674200 | 1.24493100  | -0.00012900 |
| C | -1.52731600 | 0.74301100  | 0.00009100  |
| C | -1.56603800 | -0.64091000 | 0.00012500  |
| H | -0.01729100 | 2.30920800  | -0.00019500 |
| H | -2.42132700 | 1.35566500  | 0.00022600  |
| H | -2.48099100 | -1.21905500 | 0.00030700  |
| B | 0.75950900  | 0.05500300  | -0.00027200 |
| C | 2.32666900  | 0.05342600  | 0.00003900  |
| H | 2.77596200  | 1.04711600  | -0.00290400 |
| H | 2.71313700  | -0.48599100 | 0.87170500  |
| H | 2.71427000  | -0.49203900 | -0.86728500 |
| C | -0.18746500 | -1.23643100 | -0.00013000 |
| H | -0.02782700 | -1.88713900 | 0.86814900  |
| H | -0.02812800 | -1.88694200 | -0.86861600 |
